# Supplementary figures and images for: Synthesis of hierarchically structured iron oxide in magnetic field and their hydrophobic property
Source: Royal Society of Chemistry journal article supplement (doi:10.1039/c3ce40515j), 2013-01-01

**Supporting information:**

**XRD patterns of  $\text{Fe}_3\text{O}_4$  and  $\text{Fe}_2\text{O}_3$ :**

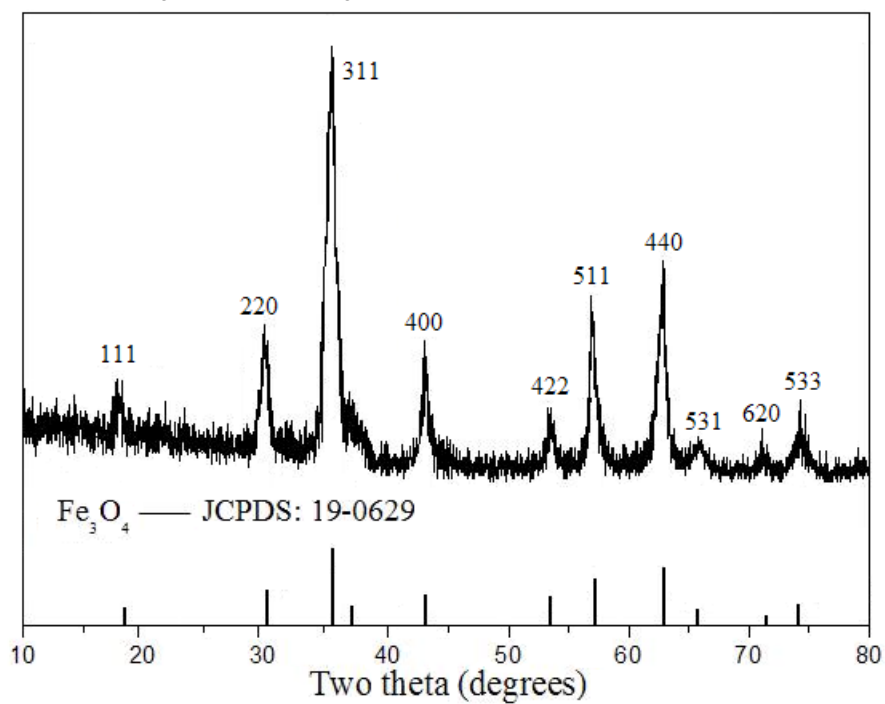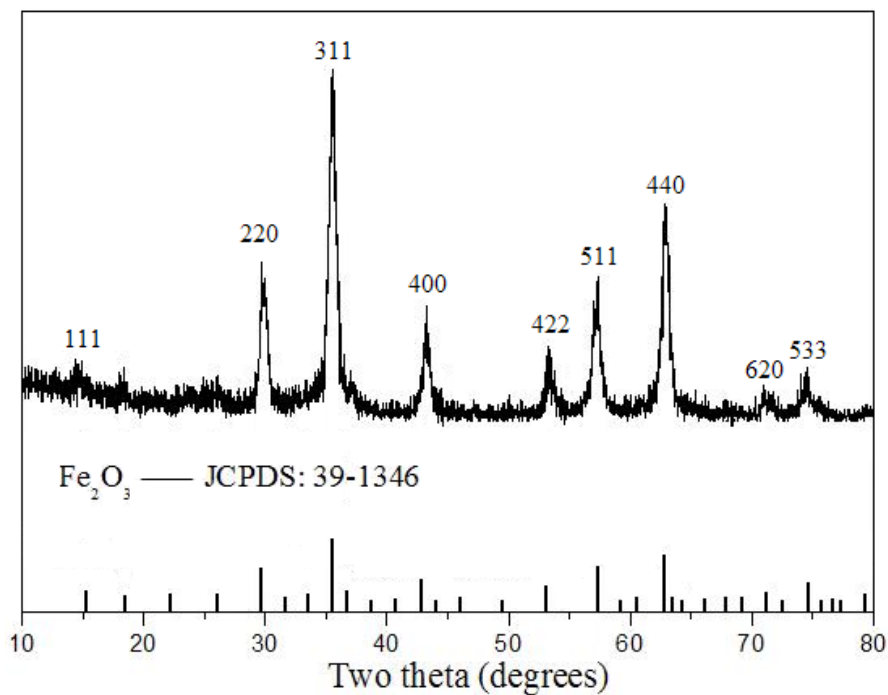

Supplement: c3ce40515j.pdf [file c3ce40515j.pdf]
